# Supplementary material
Source: PubMed Central journal article supplement (PMC3482850)
Supplement: Supp_Data.pdf [file Supp_Data.pdf]

## Supplementary Data

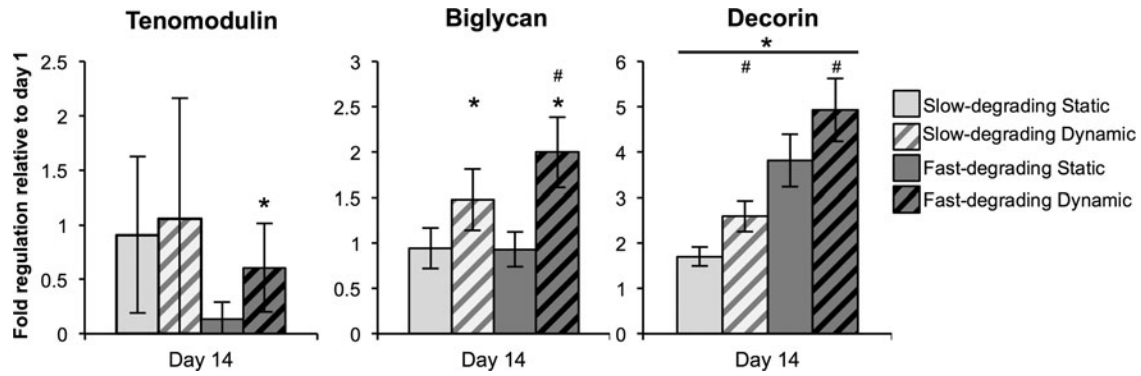

**SUPPLEMENTARY FIG. S1.** Dynamic culture significantly upregulates decorin; biglycan exhibits significant upregulation in fast-degrading gels; tenomodulin is minimally expressed. Real-time polymerase chain reaction data of encapsulated human mesenchymal stem cells ( $n \geq 6$ ), cultured statically or dynamically, at days 1 and 14. Data are normalized to their respective day 1 groups. \*Represents significance versus the same sample type at day 1; #versus the other strain condition at the same time point ( $p < 0.05$ ) (Note different y-axis scale for each graph).
